# Supplementary material
Source: PubMed Central journal article supplement (PMC5378129)
Supplement: rsif20160940supp1.pdf [file rsif20160940supp1.pdf]

|        | $E_g$  |               | $E_l$  |              |
|--------|--------|---------------|--------|--------------|
|        | $R$    | $p$ -value    | $R$    | $p$ -value   |
| $GW_K$ | 0.601  | $< 10^{-86}$  | 0.162  | $< 10^{-6}$  |
| $GW_E$ | -0.832 | $< 10^{-222}$ | 0.125  | $< 10^{-4}$  |
| $GW_N$ | 0.426  | $< 10^{-39}$  | -0.338 | $< 10^{-24}$ |
| $GW_D$ | 0.499  | $< 10^{-55}$  | -0.137 | $< 10^{-5}$  |

Table S1: Statistical correlation between global- and local-efficiency, and graph metrics. Spearman's correlation coefficients, computed from the values of the pooled frequency bands, are reported along with the corresponding  $p$ -values.
