# Supplementary material
Source: PubMed Central journal article supplement (PMC5378129)
Supplement: rsif20160940supp2.pdf [file rsif20160940supp2.pdf]

Catalina Obando and Fabrizio De Vico Fallani  
A statistical model for brain networks inferred from large-scale electrophysiological signals  
Journal of the Royal Society Interface

|              | EO       |                 |          |                 |          |                 | EC       |                 |          |                 |          |                 |
|--------------|----------|-----------------|----------|-----------------|----------|-----------------|----------|-----------------|----------|-----------------|----------|-----------------|
|              | <i>L</i> |                 | <i>C</i> |                 | <i>Q</i> |                 | <i>L</i> |                 | <i>C</i> |                 | <i>Q</i> |                 |
|              | <i>R</i> | <i>p</i> -value |
| <i>theta</i> | 0.642    | $< 10^{-14}$    | 0.861    | $< 10^{-33}$    | 0.684    | $< 10^{-16}$    | 0.669    | $< 10^{-15}$    | 0.834    | $< 10^{-29}$    | 0.663    | $< 10^{-15}$    |
| <i>alpha</i> | 0.589    | $< 10^{-11}$    | 0.797    | $< 10^{-25}$    | 0.552    | $< 10^{-10}$    | 0.495    | $< 10^{-8}$     | 0.840    | $< 10^{-30}$    | 0.650    | $< 10^{-14}$    |
| <i>beta</i>  | 0.583    | $< 10^{-11}$    | 0.875    | $< 10^{-35}$    | 0.540    | $< 10^{-9}$     | 0.638    | $< 10^{-13}$    | 0.871    | $< 10^{-34}$    | 0.618    | $< 10^{-13}$    |
| <i>gamma</i> | 0.587    | $< 10^{-11}$    | 0.794    | $< 10^{-24}$    | 0.446    | $< 10^{-6}$     | 0.490    | $< 10^{-8}$     | 0.871    | $< 10^{-34}$    | 0.559    | $< 10^{-10}$    |

Table S2: Pearson's correlation coefficient between the values of the graph indices in the observed brain networks and the corresponding mean values obtained in simulated networks.
