# Supplementary material
Source: PubMed Central journal article supplement (PMC5378129)
Supplement: rsif20160940supp4.pdf [file rsif20160940supp4.pdf]

Supplementary Figures and Tables

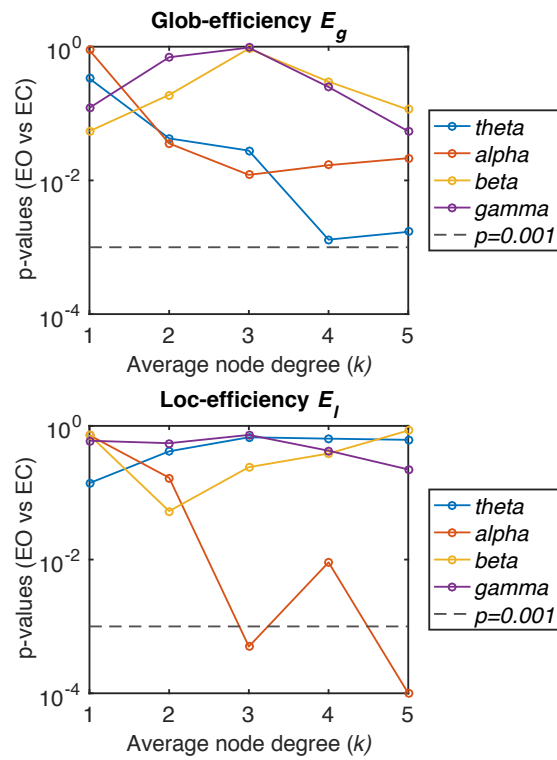

Figure S1: Statistical differences for global- and local-efficiency across different threshold values.  $p$ -values result from permutation t-tests between EO and EC conditions. Thresholds are shown as a function of the average node degree  $k$ . Five representative values have been selected for the sake of simplicity.  $k = 3$  corresponds to the ECO criterion.
