# Supplementary material
Source: PubMed Central journal article supplement (PMC5378129)
Supplement: rsif20160940supp5.pdf [file rsif20160940supp5.pdf]

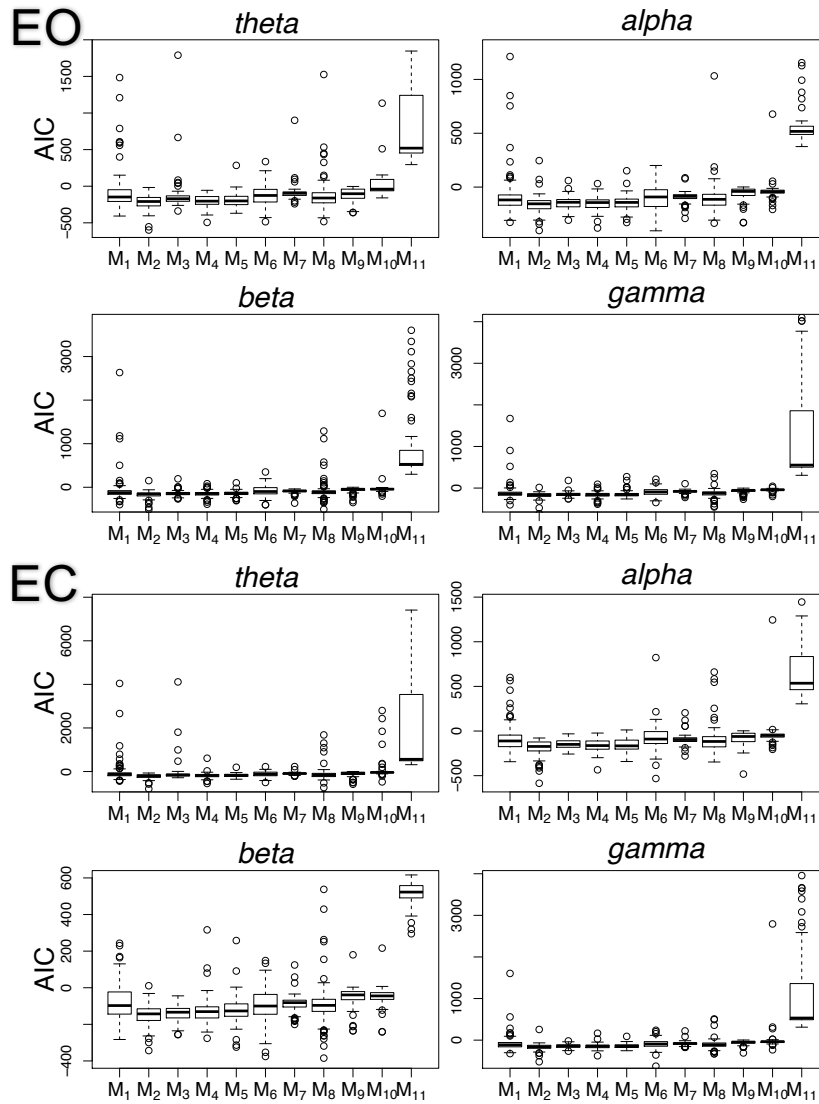

Figure S2: Box plots of the Akaike (AIC) values computed in each model configuration. Horizontal bold lines show the group medians. Circles denote outliers, bars indicate lower and upper quartiles, bars show the 5% and 95% percentiles.
