# Supplementary material
Source: PubMed Central journal article supplement (PMC5378129)
Supplement: rsif20160940supp6.pdf [file rsif20160940supp6.pdf]

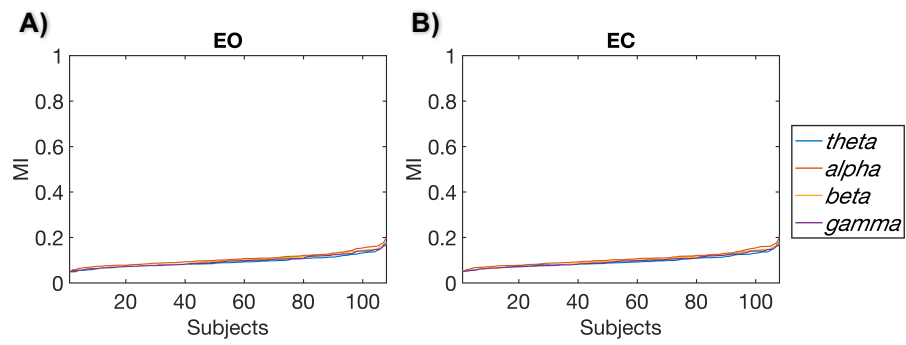

Figure S3: Mirkin index (MI) between partitions of observed networks and a consensus partition of the synthetic networks for  $k = 3$ . We selected  $\tau = 1$  as a resolution parameter to construct the consensus partition. Similar results were obtained for  $\tau > 1$  (data not shown here)
