# Supplementary material
Source: PubMed Central journal article supplement (PMC5378129)
Supplement: rsif20160940supp7.pdf [file rsif20160940supp7.pdf]

### Supplementary Text

Our main results pointed out the role of the segregation of information (i.e., local-efficiency) in the *alpha* band. This specific band is known to be the most prominent in resting state conditions [1]. However, it is possible that the selected threshold belongs to a larger interval for which differences can still be appreciated. Figure 1 (right panel), shows that local-efficiency was significantly different between conditions ( $p < 0.001$ ) only for  $k = 3$  and  $k = 5$ , while global-efficiency (left panel) never reached significance for any other  $k$  value corresponding to the typically explored ranges of density thresholds [2] (i.e., max density=0.4 or equivalently  $k=22$  in our study).

We then evaluated our modeling approach for  $k = 5$ . The ranking of the ERGM models followed the same tendency that as for  $k = 3$ .  $M_1$  gave the lowest  $\delta(E_g, E_l)$  scores as compared to other configurations (Figure 2). As for  $k = 3$ , model  $M_1$  for  $k = 5$  gave a good model adequacy (Figure 3) and cross-validation over different graph indices (Figure 4 and 5)

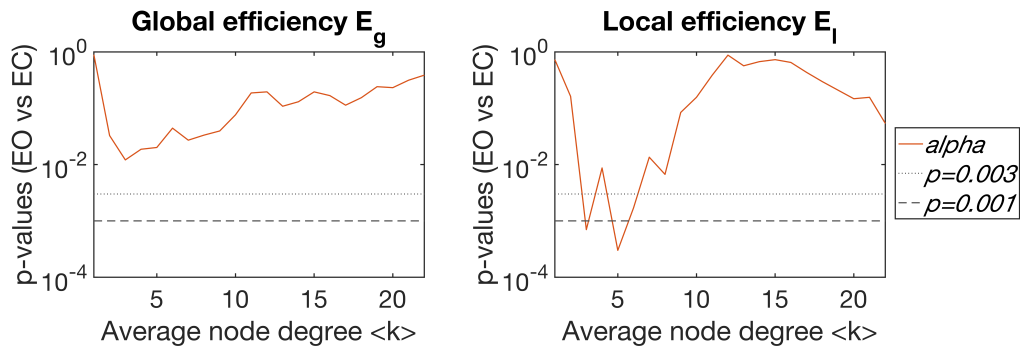

Figure 1: Statistical differences for global- and local-efficiency across different threshold values.  $p$ -values result from permutation t-tests between EO and EC conditions in the *alpha* frequency band. Thresholds are shown as a function of the average node degree  $k$ .

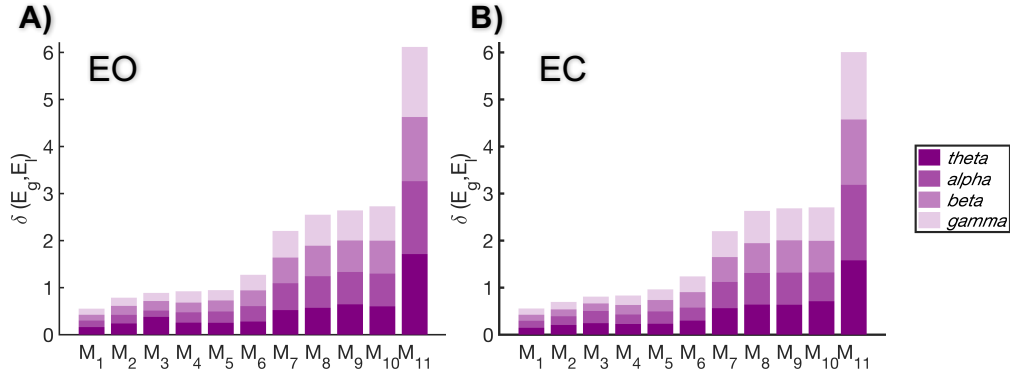

Figure 2: Absolute quality of ERG models' fit for networks thresholded with  $k = 5$ . Colored bars show the group-averaged cumulative errors  $\delta(E_g, E_l)$  in terms of relative of global- and local-efficiency across frequency bands. Model configurations are listed on the x-axis. Panel A) illustrates values for eyes-open resting-state (EO); panel B) shows the error values for eyes-closed resting-state (EC).

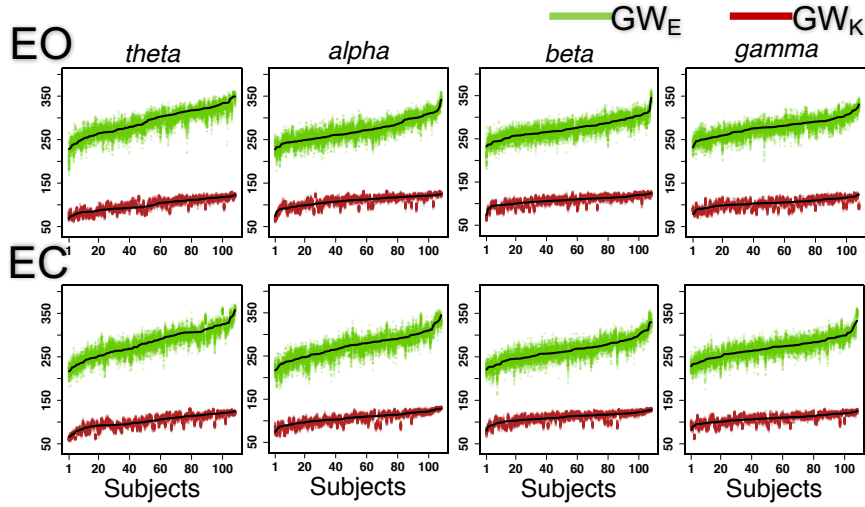

Figure 3: Adequacy of model configuration  $M_1$  for networks thresholded with  $k = 5$ . Green and red dots represent respectively the values of the *geometrically weighted edgewise shared pattern distribution* ( $GW_E$ ) and *geometrically weighted degree distribution* ( $GW_K$ ) measured in simulated networks. Black dots lines indicate the values measured in the observed brain networks.

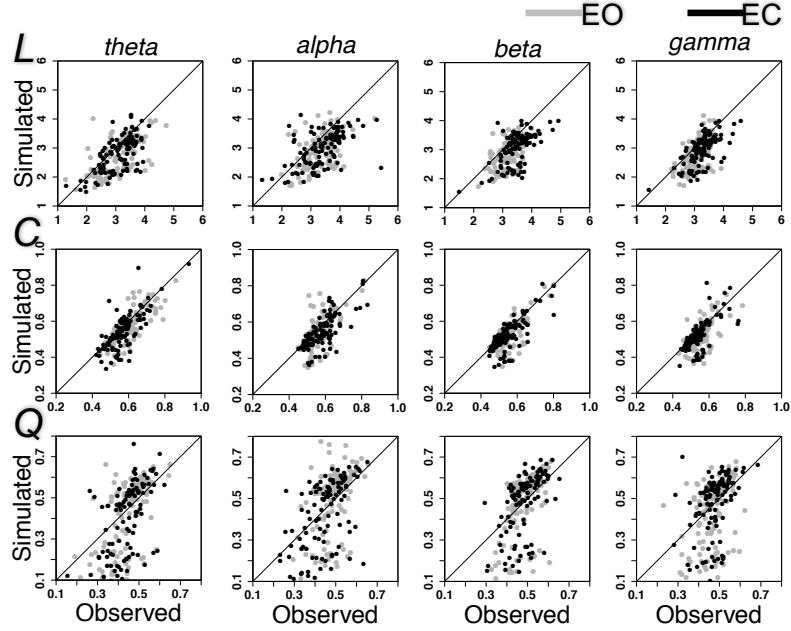

Figure 4: Cross-validation for model configuration  $M_1$  for networks thresholded with  $k = 5$ . Scatter plots show the values of the graph indices measured in the observed brain networks (x-axis) against the mean values obtained from synthetic networks (y-axis). Three graph indices were considered: characteristic path length ( $L$ ), clustering coefficient ( $C$ ) and modularity ( $Q$ ). Grey dots correspond to eyes-open resting-states (EO); black dots correspond to eyes-closed resting-states (EC).

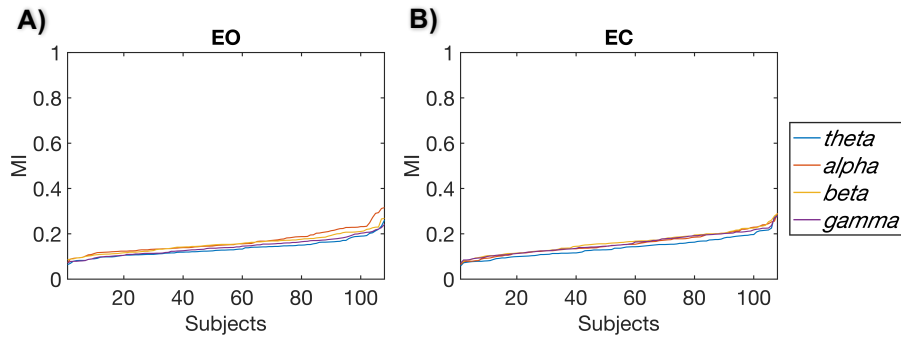

Figure 5: Mirkin index (MI) between partitions of observed networks and a consensus partition of the synthetic networks for  $k = 5$ . We selected  $\tau = 1$  as a resolution parameter to construct the consensus partition. Similar results were obtained for  $\tau > 1$  (data not shown here)

## References

- [1] W. Klimesch, Alpha-band oscillations, attention, and controlled access to stored information, *Trends in Cognitive Sciences* 16 (12) (2012) 606–617. doi:10.1016/j.tics.2012.10.007.
- [2] K. A. Garrison, D. Scheinost, E. S. Finn, X. Shen, R. T. Constable, The (in)stability of functional brain network measures across thresholds, *NeuroImage* 118 (2015) 651–661. doi:10.1016/j.neuroimage.2015.05.046.
